# Supplementary material for: The Diagnosis of Bronchopulmonary Dysplasia in Very Preterm Infants. An Evidence-based Approach
Source: PubMed Central journal article supplement — Am J Respir Crit Care Med. 2019 Sep 15;200(6):751–9. doi: 10.1164/rccm.201812-2348OC (PMC6775872; doi:10.1164/rccm.201812-2348oc), 2019-09-15
Supplement: rccm.201812-2348OC_jensen_data_supplement.pdf [file rccm.201812-2348OC_jensen_data_supplement.pdf]

**The Diagnosis of Bronchopulmonary Dysplasia in Very Preterm Infants:  
An Evidence-Based Approach**

Erik A. Jensen, MD MSCE, Kevin Dysart, MD, Marie G. Gantz, PhD, Scott McDonald BS, Nicolas A. Bamat, MD MSCE, Martin Keszler, MD; Haresh Kirpalani, BM MSc; Matthew M. Laughon, MD MPH; Brenda B. Poindexter, MD MS; Andrea F. Duncan, MD MS; Bradley A. Yoder, MD; Eric C. Eichenwald, MD, Sara B. DeMauro, MD MSCE For the Eunice Kennedy Shriver National Institute of Child Health and Human Development Neonatal Research Network

**Online Data Supplement**

## **Investigators for the *Eunice Kennedy Shriver* National Institute of Child Health and Human Development (NICHD) Neonatal Research Network**

Data collected at participating sites of the NICHD Neonatal Research Network (NRN) were transmitted to RTI International, the data coordinating center for the network, which stored, managed and analyzed the data for this study. On behalf of the NRN, Dr. Marie Gantz and Mr. Scott McDonald had full access to all study data and take responsibility for the integrity of the data and accuracy of the data analysis.

In addition to the authors, the following investigators and sites participated in this study:

NRN Steering Committee Chair: Richard A. Polin, MD, Division of Neonatology, College of Physicians and Surgeons, Columbia University, (2011-present).

Alpert Medical School of Brown University and Women & Infants Hospital of Rhode Island (UG1 HD27904) – Abbot R. Laptook, MD; Betty R. Vohr, MD; Angelita M. Hensman, MS RN; Elisa Vieira, BSN RN; Robert T. Burke, MD MPH; Bonnie E. Stephens, MD; Barbara Alksninis, RNC PNP; Carmena Bishop; Mary L. Keszler, MD; Teresa M. Leach, MEd CAES; Victoria E. Watson, MS CAS.

Case Western Reserve University, Rainbow Babies & Children's Hospital (UG1 HD21364) – Michele C. Walsh, MD MS; Avroy A. Fanaroff, MD; Nancy S. Newman, RN; Deanne E. Wilson-Costello, MD; Bonnie S. Siner, RN; Harriet G. Friedman, MA.

Children's Mercy Hospital (UG1 HD68284) – William E. Truog, MD; Eugenia K. Pallotto, MD MSCE; Howard W. Kilbride MD; Cheri Gauldin, RN BS CCRC; Anne Holmes RN MSN MBA-HCM CCRC; Kathy Johnson RN, CCRC; Allison Knutson, BSN RNC-NIC; Prabhu S. Parimi, MD; Lisa Gaetano, RN MSN.

Cincinnati Children's Hospital Medical Center, University Hospital, and Good Samaritan Hospital (UG1 HD27853, UL1 TR77) – Kurt Schibler, MD; Suhas G. Kallapur, MD; Kimberly Yolton, PhD; Barbara Alexander, RN; Estelle E. Fischer, MHSA MBA; Teresa L. Gratton, PA; Cathy Grisby, BSN CCRC; Jennifer Jennings, RN BSN; Kristin Kirker, CRC; Lenora D. Jackson, CRC; Sandra Wuertz, RN BSN CLC.

Duke University School of Medicine, University Hospital, University of North Carolina, Duke Regional Hospital, and WakeMed Health & Hospitals (UG1 HD40492, UL1 TR1117) – C. Michael Cotten, MD MHS; Ronald N. Goldberg, MD; Ricki F. Goldstein, MD; William F. Malcolm, MD; Patricia L. Ashley, MD; Joanne Finkle, RN JD; Kimberley A. Fisher, PhD FNP-BC IBCLC; Sandra Grimes, RN BSN; Kathryn E. Gustafson, PhD; Carl L. Bose, MD; Janice Bernhardt, MS RN; Gennie Bose, RN; Janice Wereszczak, CPNP-AC/PC; Diane Warner, MD MPH; Stephen D. Kicklighter, MD; Ginger Rhodes-Ryan, ARNP MSN, NNP-BC.

Emory University, Children's Healthcare of Atlanta, Grady Memorial Hospital, and Emory University Hospital Midtown (UG1 HD27851, UL1 TR454) – David P. Carlton, MD; Barbara J. Stoll, MD; Ira Adams-Chapman, MD; Ellen C. Hale, RN BS CCRC; Yvonne Loggins, RN; Diane Bottcher, RN; Sheena L. Carter, PhD; Salathiel Kendrick-Allwood, MD; Maureen LaRossa, RN; Colleen Mackie, RRT; Gloria Smikle, PNP; Lynn Wineski, NNP.

*Eunice Kennedy Shriver* National Institute of Child Health and Human Development – Rosemary D. Higgins, MD; Stephanie Wilson Archer, MA.

Indiana University, University Hospital, Methodist Hospital, Riley Hospital for Children, and Wishard Health Services (UG1 HD27856, UL1 TR6) – Gregory M. Sokol, MD; Heidi Harmon, MD MS; Dianne E. Herron, RN CCRC; Abbey C. Hines, PsyD; Carolyn Lytle, MD MPH; Lu Ann Papile, MD; Lucy Smiley, CCRC; Leslie Dawn Wilson, BSN CCRC.

University of Texas Health Science Center at Houston Medical School, Children's Memorial Hermann Hospital, and Memorial Hermann Southwest Hospital (U10 HD21373, UG1 HD87229) – Kathleen A. Kennedy, MD MPH; Jon E. Tyson, MD MPH; Roy J. Heyne, MD; Julie Arldt-McAlister, RN BSN; Katrina Burson, RN BSN; Allison G. Dempsey, PhD; Patricia W. Evans, MD; Carmen Garcia, RN CCRP; Margarita Jimenez, MD MPH; Janice John, CPNP; Patrick M. Jones, MD MA; M. Layne Lillie, RN BSN; Karen Martin, RN; Sara C. Martin, RN BSN; Georgia E. McDavid, RN; Shawna Rodgers, RN BSN; Saba Khan Siddiki, MD; Daniel Sperry, RN; Patti L. Pierce Tate, RCP; Sharon L. Wright, MT (ASCP).

Nationwide Children's Hospital and the Ohio State University Medical Center (UG1 HD68278) – Pablo J. Sánchez, MD; Leif D. Nelin, MD; Sudarshan R. Jadcherla, MD; Patricia Luzader, RN; Christine A. Fortney, PhD RN; Gail E. Besner; Nehal A. Parikh, MD.

RTI International (UG1 HD36790) – Abhik Das, PhD; Dennis Wallace, PhD; Jeanette O'Donnell Auman, BS; Margaret Crawford, BS; Jamie E. Newman, PhD MPH; Carolyn M. Petrie Huitema, MS; Kristin M. Zaterka-Baxter, RN BSN.

Stanford University, Dominican Hospital, El Camino Hospital, and Lucile Packard Children's Hospital (UG1 HD27880, UL1 TR93) – Krisa P. Van Meurs, MD; David K. Stevenson, MD; Susan R. Hintz, MD MS Epi; Marian M. Adams, MD; M. Bethany Ball, BS CCRC; Barbara Bentley, PhD; Maria Elena DeAnda, PhD; Anne M. DeBattista, RN PNP; Lynne C. Huffman, MD; Magdy Ismael, MD MPH; Casey Krueger, PhD; Andrew Palmquist, RN; Melinda S. Proud, RCP; Nicholas H. St. John, PhD.

University of Alabama at Birmingham Health System and Children's Hospital of Alabama (UG1 HD34216) – Waldemar A. Carlo, MD; Namasivayam Ambalavanan, MD; Myriam Peralta-Carcelen, MD MPH; Kathleen G. Nelson, MD; Kirstin J. Bailey, PhD; Fred J. Biasini, PhD; Stephanie A. Chopko, PhD; Monica V. Collins, RN BSN MaEd; Shirley S. Cosby, RN BSN; Mary Beth Moses, PT MS PCS; Tara E. McNair, RN BSN; Vivien A. Phillips, RN BSN; Tara E. McNair, RN BSN; Julie Preskitt, MSOT MPH; Richard V. Rector, PhD; Sally Whitley, MA OTR-L FAOTA; Kristy A. Domnanovich, PhD; Sheree York Chapman, PT DPT PCS.

University of California - Los Angeles, Mattel Children's Hospital, Santa Monica Hospital, Los Robles Hospital and Medical Center, and Olive View Medical Center (UG1 HD68270) – Uday Devaskar, MD; Meena Garg, MD; Isabell B. Purdy, PhD CPNP; Teresa Chanlaw, MPH; Rachel Geller, RN BSN.

University of Iowa and Mercy Medical Center (UG1 HD53109, UL1 TR442) – Edward F. Bell, MD; Dan L. Ellsbury, MD; Tarah T. Colaizy, MD MPH; Jane E. Brumbaugh, MD; Karen Jo Johnson, RN BSN; Jacky R. Walker, RN; Diane L. Eastman, RN CPNP MA; Donia B. Campbell, RNC-NIC; Tracy L. Tud, RN.

University of New Mexico Health Sciences Center (UG1 HD53089, UL1 TR41) – Kristi L. Watterberg, MD; Robin K. Ohls, MD; Conra Backstrom Lacy, RN; Janell Fuller, MD; Carol Hartenberger, BSN MPH; Sandra Sundquist Beauman, MSN RNC; Mary Hanson, RN BSN; Jean R. Lowe, PhD; Julie Rohr, MSN RNC CNS.

University of Pennsylvania, Hospital of the University of Pennsylvania, Pennsylvania Hospital, and Children's Hospital of Philadelphia (UG1 HD68244) – Barbara Schmidt, MD MSc; Aasma S. Chaudhary, BS RRT; Jonathan Snyder, RN; Soraya Abbasi, MD; Toni Mancini, RN BSN CCRC; Dara M. Cucinotta, RN; Judy C. Bernbaum, MD; Marsha Gerdes, PhD; Hallam Hurt, MD.

University of Rochester Medical Center, Golisano Children's Hospital, and the University of Buffalo Women's and Children's Hospital of Buffalo (UG1 HD68263, UL1 TR42) – Carl T. D'Angio, MD; Ronnie Guillet, MD PhD; Gary J. Myers, MD; Satyan Lakshminrusimha, MD; Anne Marie Reynolds, MD; Holly I.M. Wadkins; Michael G. Sacilowski, BS; Rosemary L. Jensen; Joan Merzbach, LMSW; William Zorn, PhD; Osman Farooq, MD; Dee Maffett, RN; Ashley Williams, MEd; Julianne Hunn, BS; Stephanie Guilford, BS; Kelley Yost, PhD; Mary Rowan, RN; Diane Prinzing; Karen Wynn, RN; Melissa Bowman, RN NP.

University of Texas Southwestern Medical Center, Parkland Health & Hospital System, and Children's Medical Center Dallas (UG1 HD40689) – Myra H. Wyckoff, MD; Pablo J. Sánchez, MD; Luc P. Brion, MD; Diana M. Vasil, RNC-NIC; Sally S. Adams, MS RN CPNP; Lijun Chen, RN, PhD; Lara Pavageau, MD; Alicia Guzman; Elizabeth Heyne, PsyD PA-C; Linda A. Madden, BSN RN CPNP; Lizette E. Torres, RN; Cathy Twell Boatman, MS CIMI.

University of Utah (UG1 HD87226, UL1 TR105) – Bradley A. Yoder, MD.

Wayne State University, Hutzel Women's Hospital, and Children's Hospital of Michigan (UG1 HD21385) – Seetha Shankaran, MD; Athina Pappas, MD; Beena G. Sood, MD MS; Girija Natarajan, MD; Melissa February, MD; Prashant Agarwal, MD; Sanjay Chawla, MD; Monika Bajaj, MD; Rebecca Bara, RN BSN; Kirsten Childs, RN BSN; Eunice Woldt, RN MSN; Laura Goldston, MA, Stephanie A. Wiggins, MS; Mary K. Christensen, BA RRT; Martha Carlson, MD; John Barks, MD.

**Table E1. Modified\* 2018 National Institute of Child Health and Human Development workshop definition for bronchopulmonary dysplasia**

|              | Treatment with the following mode of respiratory support and FiO <sub>2</sub> at 36 weeks postmenstrual age or discharge home, if earlier: |             |                  |                              |              |
|--------------|--------------------------------------------------------------------------------------------------------------------------------------------|-------------|------------------|------------------------------|--------------|
| BPD severity | Breathing in room air                                                                                                                      | NC < 1L/min | NC 1 to < 3L/min | NC ≥ 3L/min, nCPAP, or NIPPV | Invasive PPV |
| No BPD       | 21%                                                                                                                                        | 21%         | 21%              | -                            | -            |
| Grade 1      | -                                                                                                                                          | 22-70%      | 22-29%           | 21%                          | -            |
| Grade 2      | -                                                                                                                                          | 71-100%     | 30-100%          | 22-29%                       | 21%          |
| Grade 3      | -                                                                                                                                          | -           | -                | 30-100%                      | 22-100%      |

\* The following modifications were made to the published criteria<sup>1</sup> to enable application to the study data: (1) no evaluation for radiographic evidence of parenchymal lung disease was performed, (2) respiratory support assessed only at 36 weeks PMA and not according to the supplemental oxygen level required to maintain arterial oxygen saturation of 90-95% for ≥3 consecutive days.

C-statistics for late death or serious respiratory morbidity and late death or moderate to severe neurodevelopmental impairment calculated for this definition using multivariable logistic regression: 0.768 and 0.738, respectively. Both values are significantly lower ( $p \leq 0.002$ ) than those generated for the optimal definition of BPD.

*Abbreviations:* BPD, bronchopulmonary dysplasia; FiO<sub>2</sub>, fraction of inspired oxygen; NC, nasal cannula; nCPAP, nasal continuous positive airway pressure; NIPPV, nasal intermittent positive pressure ventilation; PPV, positive pressure ventilation

**Table E2. Characteristics of the included and excluded infants**

| <i>Characteristic</i>                                      | Infants included in the analysis<br>n=2677 | Infants lost to follow-up or missing data<br>N=742 | p-value* |
|------------------------------------------------------------|--------------------------------------------|----------------------------------------------------|----------|
| Gestational age, weeks - mean (SD)                         | 25.2 (1.3)                                 | 25.3 (1.2)                                         | 0.02     |
| < 27 weeks, n (%)                                          | 2380 (89%)                                 | 666 (90%)                                          | 0.55     |
| 27-31 <sup>6/7</sup> weeks, n (%)                          | 297 (11%)                                  | 76 (10%)                                           |          |
| Birth weight, g - mean (SD)                                | 765 (168)                                  | 789 (170)                                          | <0.001   |
| Male sex, n (%)                                            | 1356 (51%)                                 | 384 (52%)                                          | 0.53     |
| Small for gestational age, n (%)                           | 219 (8%)                                   | 42 (6%)                                            | 0.02     |
| Race, n (%)                                                |                                            |                                                    | 0.02     |
| Black                                                      | 1225 (46%)                                 | 274 (42%)                                          |          |
| White                                                      | 1312 (49%)                                 | 327 (50%)                                          |          |
| Other                                                      | 140 (5%)                                   | 51 (8%)                                            |          |
| Ethnicity, n (%)                                           |                                            |                                                    | <0.001   |
| Hispanic                                                   | 322 (12%)                                  | 129 (18%)                                          |          |
| Non-Hispanic                                               | 2355 (88%)                                 | 573 (82%)                                          |          |
| Antenatal corticosteroids, n (%)                           | 2397 (90%)                                 | 667 (91%)                                          | 0.41     |
| Antenatal magnesium, n (%)                                 | 2077 (78%)                                 | 558 (78%)                                          | 0.88     |
| Maternal marital status - married n (%)                    | 1126 (42%)                                 | 304 (41%)                                          | 0.64     |
| Insurance type, n (%)                                      |                                            |                                                    | <0.001   |
| Medicaid                                                   | 1528 (57%)                                 | 463 (63%)                                          |          |
| Private                                                    | 1012 (38%)                                 | 222 (30%)                                          |          |
| Self-pay/Uninsured                                         | 101 (4%)                                   | 38 (5%)                                            |          |
| Other                                                      | 36 (1%)                                    | 17 (2%)                                            |          |
| Maternal level of education – less than high school, n (%) | 499 (19%)                                  | 140 (22%)                                          | 0.04     |

Missing data: Male sex (n=4), SGA (n=4), Race (n=90), Ethnicity (n=40), Antenatal steroids (n=6), Antenatal magnesium (n=26), Marital status (n=2), Insurance type (n=2), Maternal education (n=118).

\* P-values calculated using Fisher's exact test (categorical variables) or Wilcoxon two-sample tests (continuous variables).

**Table E3. Comparison of c-statistics calculated using the full cohort and 100 bootstrap cohorts**

| BPD definition | Late death or serious respiratory morbidity |                                  | Late death or moderate to severe neurodevelopmental impairment |                                  |
|----------------|---------------------------------------------|----------------------------------|----------------------------------------------------------------|----------------------------------|
|                | Full cohort c-statistic                     | Internally-validated c-statistic | Full cohort c-statistic                                        | Internally-validated C-statistic |
| 1              | 0.741                                       | 0.731                            | 0.727                                                          | 0.719                            |
| 2              | 0.763                                       | 0.755                            | 0.736                                                          | 0.728                            |
| 3              | 0.741                                       | 0.732                            | 0.725                                                          | 0.717                            |
| 4              | 0.780                                       | 0.771                            | 0.743                                                          | 0.735                            |
| 5              | 0.776                                       | 0.767                            | 0.740                                                          | 0.732                            |
| 6              | 0.784                                       | 0.776                            | 0.745                                                          | 0.738                            |
| 7              | 0.782                                       | 0.774                            | 0.743                                                          | 0.736                            |
| 8              | 0.779                                       | 0.770                            | 0.741                                                          | 0.733                            |
| 9              | 0.775                                       | 0.766                            | 0.738                                                          | 0.730                            |
| 10             | 0.741                                       | 0.732                            | 0.730                                                          | 0.722                            |
| 11             | 0.764                                       | 0.756                            | 0.739                                                          | 0.731                            |
| 12             | 0.742                                       | 0.733                            | 0.728                                                          | 0.720                            |
| 13             | 0.781                                       | 0.773                            | 0.745                                                          | 0.738                            |
| 14             | 0.776                                       | 0.767                            | 0.742                                                          | 0.734                            |
| 15*            | 0.785                                       | 0.777                            | 0.747                                                          | 0.740                            |
| 16             | 0.783                                       | 0.775                            | 0.746                                                          | 0.739                            |
| 17             | 0.780                                       | 0.772                            | 0.744                                                          | 0.737                            |
| 18             | 0.776                                       | 0.768                            | 0.741                                                          | 0.734                            |

\* Definition 15 produced the highest c-statistics for both study outcomes in the full cohort and through bootstrap internal validation

Abbreviations: BPD, bronchopulmonary dysplasia; NDI, neurodevelopmental impairment

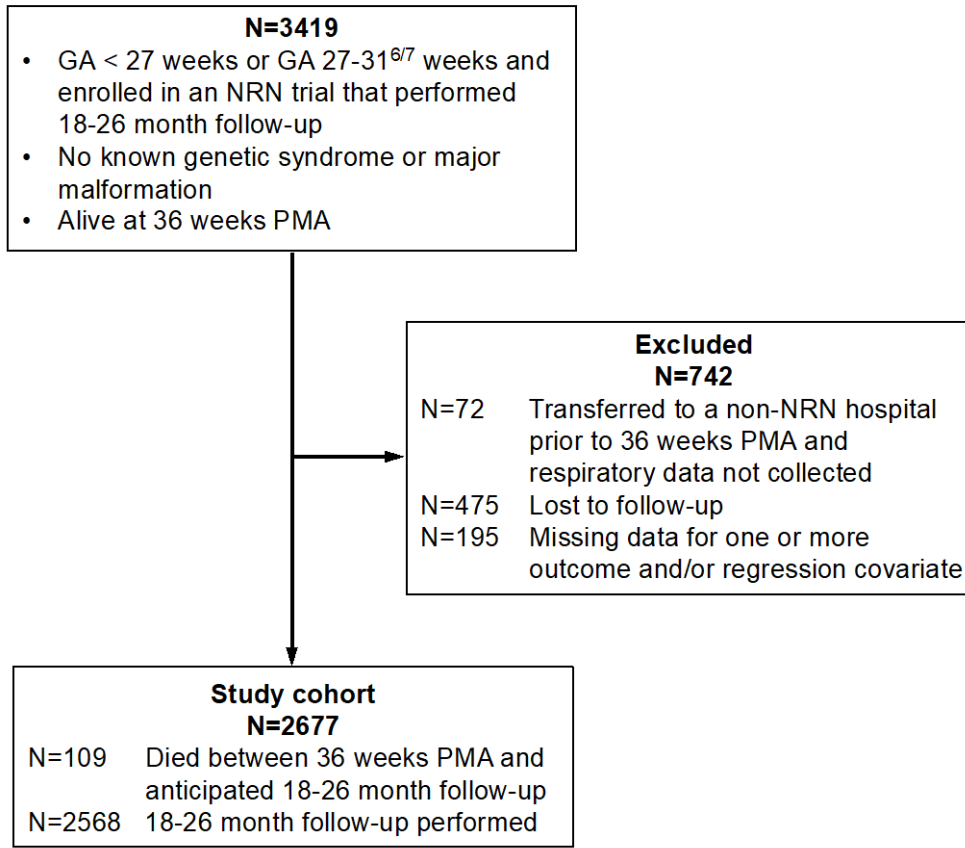

**Figure E1. Flow diagram of study infants.**

Abbreviations: GA, gestational age; NRN, neonatal research network; PMA, postmenstrual age.



**A Late death or serious respiratory morbidity**

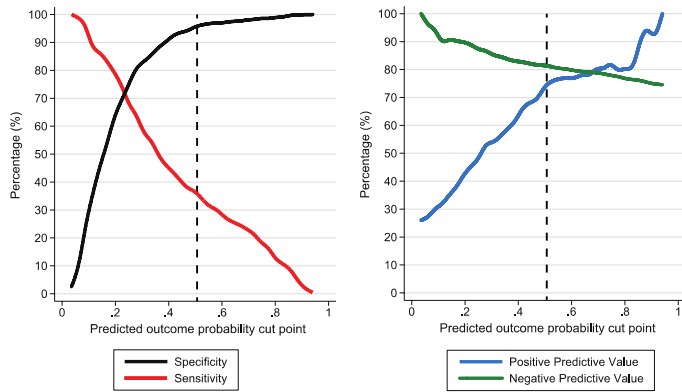

**Diagnostic performance of the optimal BPD definition for predicting late death or serious respiratory morbidity**

| Performance measure          | Predicted outcome probability cutpoint |      |      |
|------------------------------|----------------------------------------|------|------|
|                              | 25%                                    | 51%* | 75%  |
| Sensitivity                  | 69%                                    | 36%  | 18%  |
| Specificity                  | 75%                                    | 96%  | 99%  |
| Positive predictive value    | 48%                                    | 75%  | 81%  |
| Negative predictive value    | 87%                                    | 81%  | 78%  |
| Likelihood ratio +           | 2.7                                    | 8.6  | 12.7 |
| Likelihood ratio -           | 0.42                                   | 0.67 | 0.83 |
| Percent correctly classified | 73%                                    | 81%  | 78%  |

\*Probability cut point resulting in the highest proportion of infants classified correctly for the study outcome

**B Late death or moderate to severe NDI**

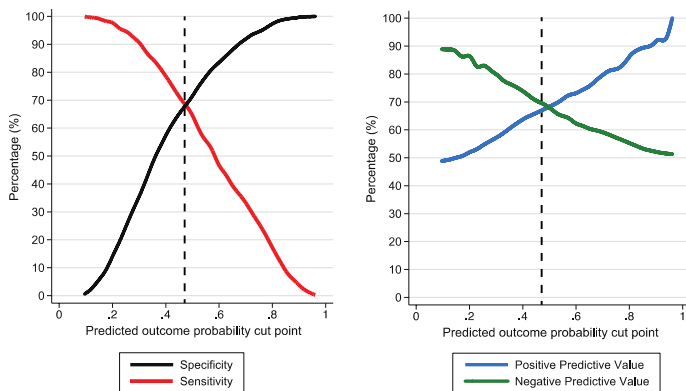

**Diagnostic performance of the optimal BPD definition for predicting late death or moderate to severe NDI**

| Performance measure          | Predicted outcome probability cutpoint |      |      |
|------------------------------|----------------------------------------|------|------|
|                              | 25%                                    | 47%* | 75%  |
| Sensitivity                  | 95%                                    | 69%  | 26%  |
| Specificity                  | 24%                                    | 68%  | 94%  |
| Positive predictive value    | 54%                                    | 67%  | 82%  |
| Negative predictive value    | 83%                                    | 70%  | 57%  |
| Likelihood ratio +           | 1.3                                    | 2.2  | 4.7  |
| Likelihood ratio -           | 0.21                                   | 0.45 | 0.79 |
| Percent correctly classified | 59%                                    | 69%  | 61%  |

\*Probability cut point resulting in the highest proportion of infants classified correctly for the study outcome

**Figure E2. Diagnostic performance of the optimal definition of bronchopulmonary dysplasia for (A) predicting for late death or serious respiratory morbidity and (B) late death or moderate to severe neurodevelopmental impairment (NDI).**

The outcome probability values were calculated using logistic regression, adjusting for gestational age, birth weight, sex, small for gestational age, race/ethnicity, treatment with antenatal corticosteroids, treatment with antenatal magnesium, maternal level of education, insurance type, primary caretaker marital status, and study center. The adjusted outcome probability cut point (x-axis) indicates the point at which all infants with a calculated probability equal to or above that threshold were assumed to develop the outcome of interest. The data shown in the figures were generated by comparing this dichotomous predicted outcome at each cut point with each infant's actual outcome using receiver operating characteristic curves. The dashed lines indicate the predicted outcome probability cut point resulting in the highest proportion of infants classified correctly for the presence or absence of the study outcome. Curves smoothed using a median band-line function.

## REFERENCES

1. Higgins RD, Jobe AH, Koso-Thomas M, et al. Bronchopulmonary dysplasia: executive summary of a workshop. *J Pediatr* 2018;197:300-08.
